# Supplementary material for: Increased trends in global extreme fire weather driven predominantly by atmospheric humidity and temperature
Source: Research Square preprint supplement (doi:10.21203/rs.3.rs-595210/v1), 2021-06-11
Supplement: Supplementary file 1 [file 91a994fd328cdf6937ba463e.pdf]

**Supplemental information for:**

**Increased trends in global extreme fire weather driven predominantly by atmospheric humidity and temperature**

Piyush Jain<sup>1,\*</sup>, Dante Castellanos-Acuna<sup>2</sup>, Sean C. P. Coogan<sup>2</sup>, John T. Abatzoglou<sup>3</sup>, Mike D. Flannigan<sup>2</sup>

<sup>1</sup>Natural Resources Canada, Canadian Forest Service, Northern Forestry Centre, Edmonton, AB, Canada. Email: [piyush.jain@canada.ca](mailto:piyush.jain@canada.ca)

<sup>2</sup>Department of Renewable Resources, University of Alberta, Edmonton, AB, Canada. Email: [scoogan@ualberta.ca](mailto:scoogan@ualberta.ca); [dcastell@ualberta.ca](mailto:dcastell@ualberta.ca); [mike.flannigan@ualberta.ca](mailto:mike.flannigan@ualberta.ca)

<sup>3</sup>Management of Complex Systems, University of California, Merced, CA, USA. Email: [jabatzoglou@ucmerced.edu](mailto:jabatzoglou@ucmerced.edu)

**Correspondence:** [piyush.jain@canada.ca](mailto:piyush.jain@canada.ca)

Table S1: Observed fire season for each continent/biome combination. Highlighted months correspond to at least 90% of area burned for each continent x biome combination. See methods for details.

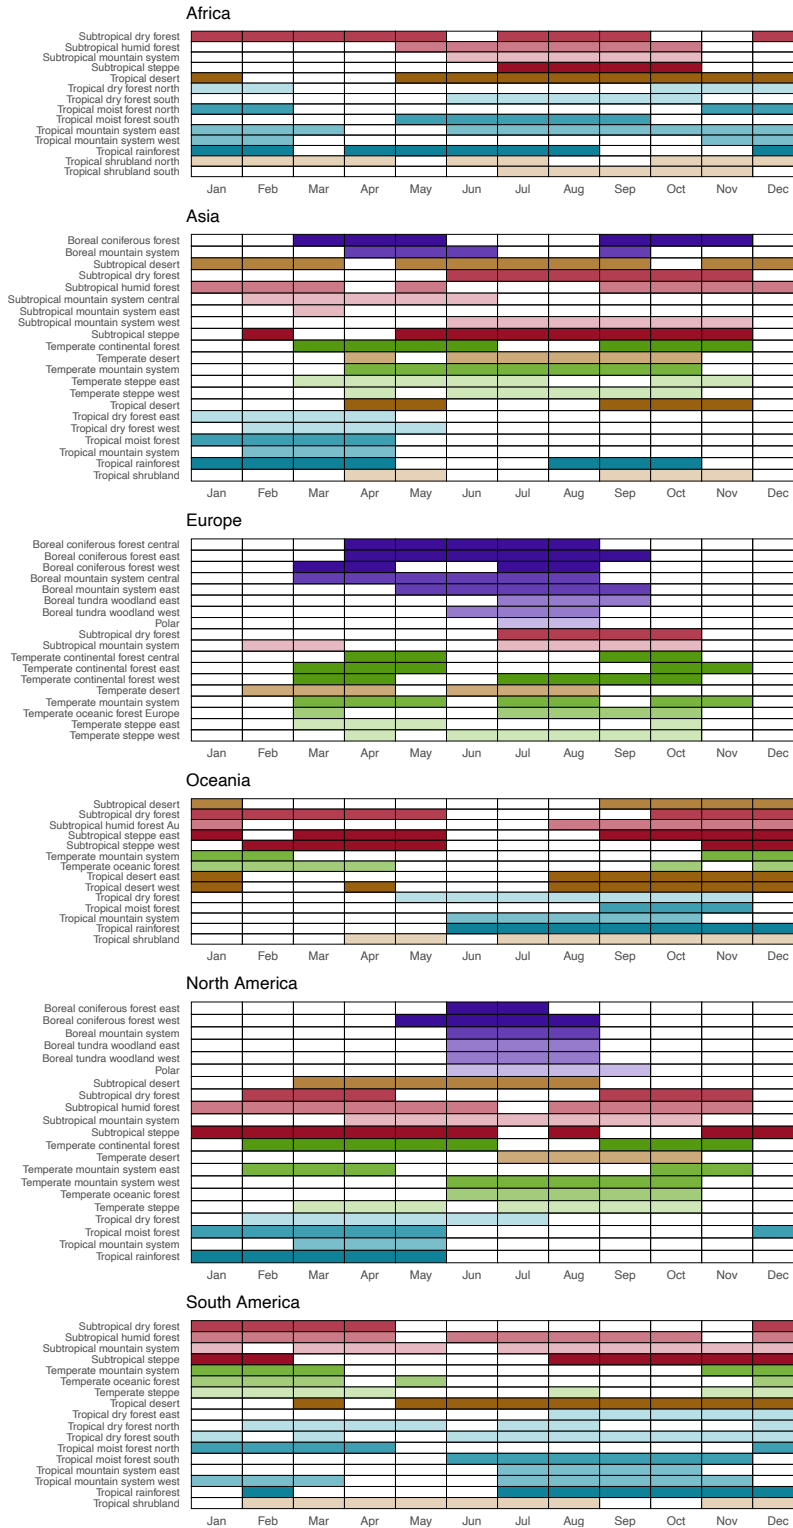

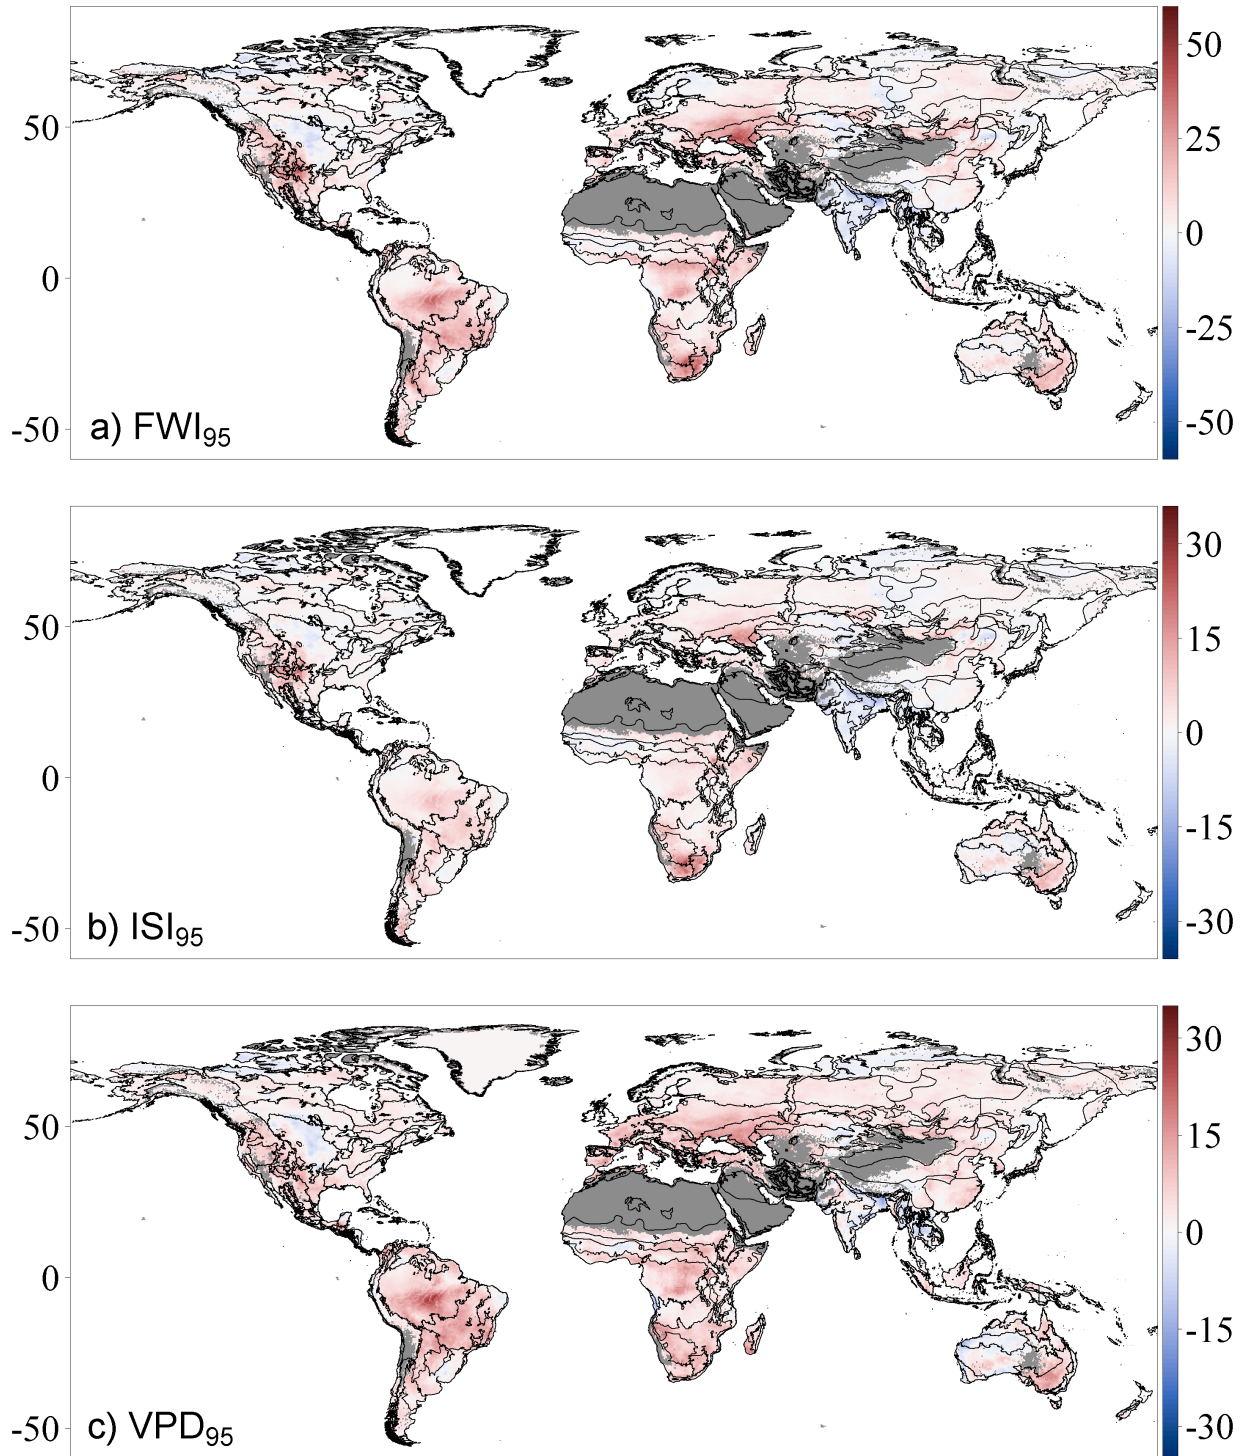

Figure S1: All trends (per 41y) in the annual 95<sup>th</sup> percentile of the Fire Weather Index (FWI<sub>95</sub>) (Panel a), Initial Spread Index (ISI<sub>95</sub>) (Panel b) and Vapour Pressure Deficit (VPD<sub>95</sub>) (Panel c). Areas shaded dark grey are predominantly barren (i.e., without appreciable burnable biomass) and are excluded from the calculation. Displayed trends are given by the Thiel-Sen slope estimator. See methods for further details.

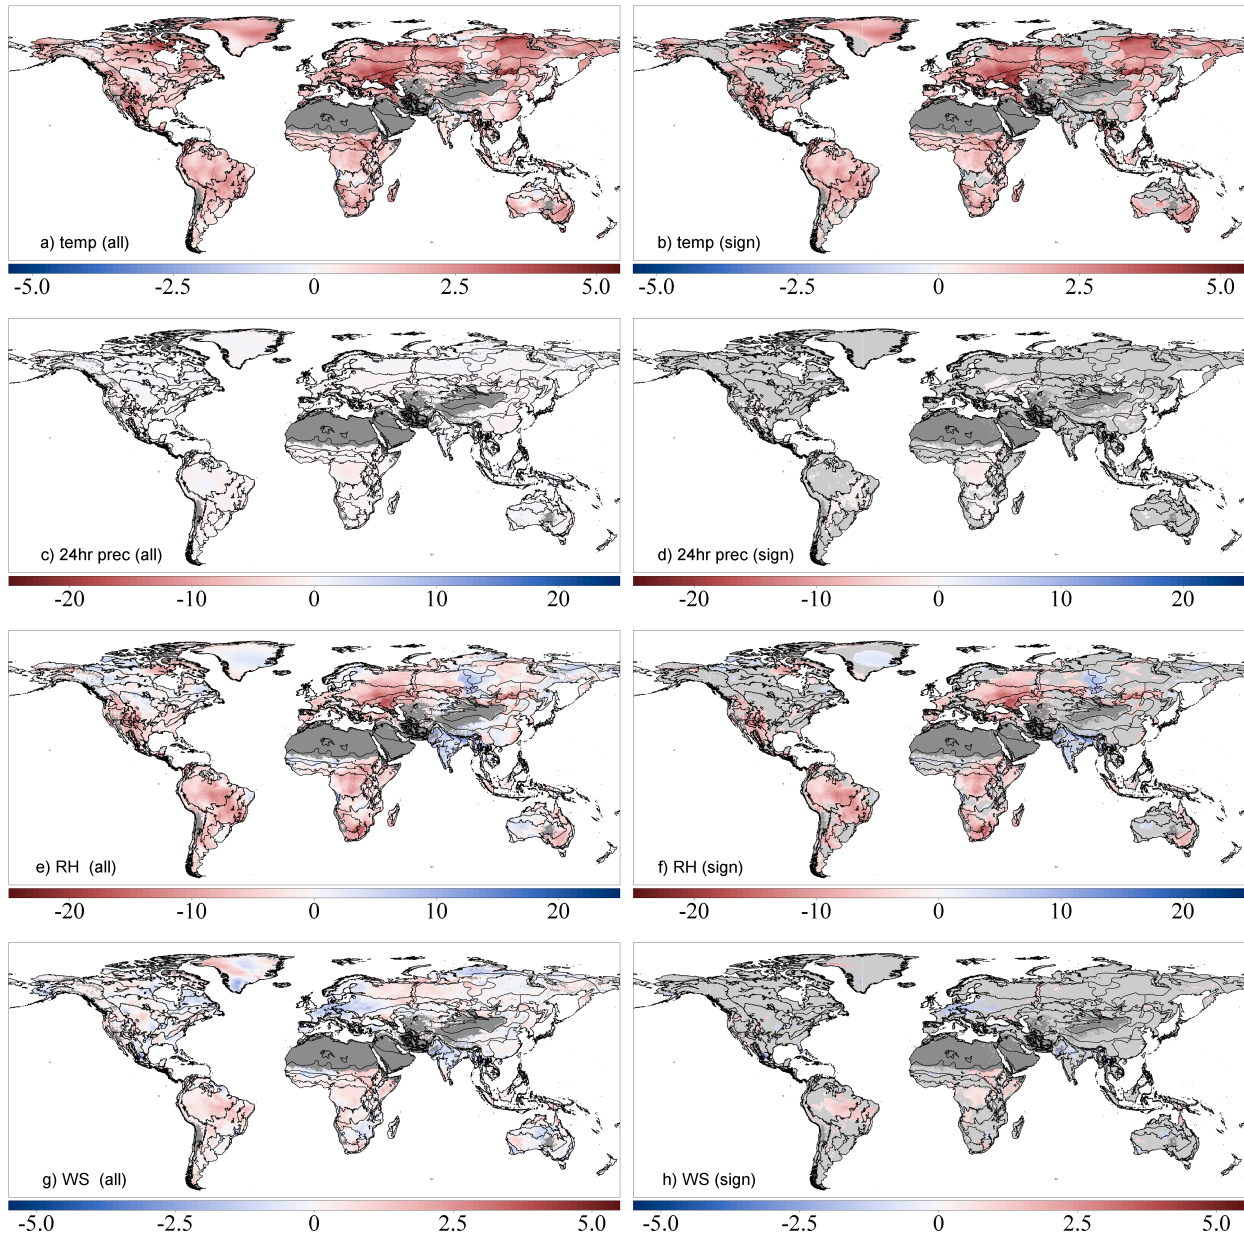

Figure S2: Trends in fire season mean of noon FWI input values; all trends for 2m temperature ( $T$ ;  $^{\circ}\text{C}/41\text{yr}$ ), 24 hour accumulated precipitation ( $\text{mm}/41\text{yr}$ ), relative humidity ( $\text{RH}$ ; per 41yr) and wind speed ( $\text{WS}$ ;  $\text{km}/\text{hr}/41\text{yr}$ ) shown in panels a, c, e and g respectively; corresponding significant trends shown in panels b, d, f and h respectively.

Table S2: Percentage of significant trends (total, positive and negative) for FWI<sub>95</sub>, ISI<sub>95</sub> and VPD<sub>95</sub> for each biome. For the same three variables, also shown are mean trend sizes (per 41yr) for all grid cells, positive trends only and negative trends only, summarized by biome. Values in parentheses are the corresponding mean trend sizes for significant trends only.

| Percentage significant       | FWI <sub>95</sub> |                 |                 | ISI <sub>95</sub> |                 |                 | VPD <sub>95</sub> |                   |                   |
|------------------------------|-------------------|-----------------|-----------------|-------------------|-----------------|-----------------|-------------------|-------------------|-------------------|
|                              | all               | positive        | negative        | all               | positive        | negative        | all               | positive          | negative          |
| Boreal coniferous forest     | 8.4               | 7.2             | 1.1             | 16.0              | 14.0            | 2.0             | 17.1              | 16.8              | 0.3               |
| Boreal mountain system       | 10.0              | 8.9             | 1.1             | 12.1              | 9.8             | 2.3             | 30.5              | 30.4              | 0.1               |
| Boreal tundra woodland       | 5.1               | 4.0             | 1.1             | 7.7               | 6.8             | 0.8             | 15.1              | 15.1              | 0.1               |
| Polar                        | 3.7               | 2.9             | 0.9             | 2.9               | 2.0             | 0.9             | 40.1              | 37.6              | 2.5               |
| Subtropical desert           | 26.8              | 26.6            | 0.2             | 22.4              | 22.1            | 0.3             | 36.6              | 35.4              | 1.2               |
| Subtropical dry forest       | 45.9              | 44.0            | 1.9             | 51.0              | 48.9            | 2.1             | 72.4              | 70.9              | 1.6               |
| Subtropical humid forest     | 19.0              | 18.9            | 0.0             | 25.8              | 25.7            | 0.1             | 48.6              | 48.6              | 0.1               |
| Subtropical mountain system  | 39.5              | 37.6            | 1.9             | 40.1              | 37.4            | 2.6             | 54.7              | 53.3              | 1.5               |
| Subtropical steppe           | 51.2              | 49.4            | 1.7             | 44.6              | 42.6            | 2.1             | 65.2              | 64.8              | 0.4               |
| Temperate continental forest | 29.3              | 29.3            | 0.1             | 33.2              | 33.1            | 0.2             | 54.2              | 54.2              | 0.0               |
| Temperate desert             | 34.3              | 34.2            | 0.1             | 29.9              | 28.4            | 1.4             | 65.2              | 64.1              | 1.1               |
| Temperate mountain system    | 25.8              | 25.2            | 0.7             | 23.3              | 22.4            | 0.9             | 54.1              | 53.7              | 0.5               |
| Temperate oceanic forest     | 8.8               | 8.5             | 0.3             | 12.2              | 12.0            | 0.2             | 67.8              | 67.5              | 0.2               |
| Temperate steppe             | 34.3              | 34.1            | 0.2             | 32.0              | 31.1            | 0.9             | 46.3              | 43.8              | 2.5               |
| Tropical desert              | 37.0              | 28.2            | 8.7             | 37.7              | 27.0            | 10.7            | 40.2              | 36.0              | 4.2               |
| Tropical dry forest          | 43.7              | 37.5            | 6.2             | 43.4              | 35.6            | 7.8             | 62.6              | 57.7              | 5.0               |
| Tropical moist forest        | 48.4              | 44.8            | 3.6             | 49.0              | 42.5            | 6.5             | 63.1              | 59.3              | 3.8               |
| Tropical mountain system     | 45.0              | 41.7            | 3.3             | 47.1              | 41.5            | 5.6             | 60.6              | 58.7              | 1.9               |
| Tropical rainforest          | 54.4              | 52.5            | 1.9             | 53.1              | 50.8            | 2.4             | 73.7              | 72.1              | 1.6               |
| Tropical shrubland           | 55.0              | 49.7            | 5.3             | 54.1              | 48.0            | 6.2             | 63.7              | 62.7              | 1.0               |
| <b>Mean trend size</b>       | <b>all</b>        | <b>positive</b> | <b>negative</b> | <b>all</b>        | <b>positive</b> | <b>negative</b> | <b>all</b>        | <b>positive</b>   | <b>negative</b>   |
|                              | <b>(/41yr)</b>    | <b>(/41yr)</b>  | <b>(/41yr)</b>  | <b>(/41yr)</b>    | <b>(/41yr)</b>  | <b>(/41yr)</b>  | <b>(hPa/41yr)</b> | <b>(hPa/41yr)</b> | <b>(hPa/41yr)</b> |
| Boreal coniferous forest     | 2.0 (5.1)         | 3.2 (6.7)       | -2.2 (-5.5)     | 0.8 (1.6)         | 1.2 (2.1)       | -2.2 (-3.4)     | 2.2 (3.4)         | 2.4 (3.6)         | -1.3 (-5.3)       |
| Boreal mountain system       | 1.5 (5.1)         | 2.5 (6.1)       | -1.4 (-3.4)     | 0.5 (1.6)         | 0.9 (2.3)       | -0.6 (-1.7)     | 2.1 (3.5)         | 2.3 (3.5)         | -0.7 (-1.9)       |
| Boreal tundra woodland       | 1.3 (5.4)         | 2.6 (8.4)       | -1.5 (-5.3)     | 0.5 (2.3)         | 1.0 (2.8)       | -0.6 (-2.0)     | 1.7 (3.5)         | 1.9 (3.5)         | -0.7 (-3.6)       |
| Polar                        | 0.5 (3.8)         | 3.0 (7.7)       | -0.8 (-7.0)     | 0.0 (0.9)         | 1.3 (3.1)       | -0.5 (-2.7)     | 0.4 (1)           | 1.1 (1.3)         | -1.4 (-3.2)       |
| Subtropical desert           | 5.8 (13.9)        | 7.1 (13.9)      | -               | 2.9 (7.9)         | 4.1 (8.0)       | -1.6 (-4.7)     | 3.1 (6.7)         | 4.9 (7.3)         | -2.2 (-8.1)       |
| Subtropical dry forest       | 5.0 (8.1)         | 5.9 (8.7)       | -2.7 (-6.0)     | 2.0 (3.1)         | 2.3 (3.3)       | -1.1 (-2.7)     | 5.4 (6.8)         | 5.9 (7.1)         | -2.2 (-4.8)       |
| Subtropical humid forest     | 3.5 (10.9)        | 4.7 (10.9)      | -1.4 (-3.1)     | 1.1 (3.1)         | 1.5 (3.1)       | -0.4 (-1.2)     | 3.2 (5.1)         | 3.6 (5.1)         | -1 (-2.1)         |
| Subtropical mountain system  | 5.7 (13.4)        | 8.9 (14.5)      | -1.8 (-4.5)     | 2.5 (6.1)         | 4.1 (6.7)       | -1.0 (-2.7)     | 3.9 (6.6)         | 5 (6.8)           | -0.9 (-2.9)       |
| Subtropical steppe           | 9.9 (16.6)        | 11.4 (16.8)     | -3.2 (-8.0)     | 4.3 (8.1)         | 5.2 (8.3)       | -1.5 (-3.9)     | 6.2 (8.4)         | 6.7 (8.5)         | -2.1 (-6.3)       |
| Temperate continental forest | 5.3 (12.9)        | 6.6 (12.9)      | -1.6 (-5.4)     | 1.7 (3.8)         | 2.1 (3.8)       | -0.6 (-1.9)     | 4.5 (6.7)         | 4.7 (6.7)         | -0.6 (-1.9)       |
| Temperate desert             | 6.1 (13.8)        | 8.3 (13.8)      | -               | 2.3 (5.6)         | 3.6 (6.1)       | -1.6 (-4.1)     | 5.3 (7.6)         | 6.3 (7.8)         | -1.9 (-4.7)       |
| Temperate mountain system    | 3.8 (11.5)        | 5.7 (11.8)      | -1.5 (-4.0)     | 1.1 (3.8)         | 1.9 (3.9)       | -0.7 (-1.8)     | 2.9 (4.5)         | 3.3 (4.6)         | -0.8 (-1.9)       |
| Temperate oceanic forest     | 2.8 (6.1)         | 3.5 (6.6)       | -1.6 (-7.8)     | 0.8 (2.1)         | 1.1 (2.1)       | -0.5 (-2.0)     | 4.8 (6.4)         | 5.1 (6.4)         | -0.6 (-0.5)       |
| Temperate steppe             | 6.8 (18.5)        | 11.4 (18.7)     | -3.9 (-12.8)    | 2.7 (7.2)         | 4.3 (7.5)       | -1.6 (-5.2)     | 3.9 (7.8)         | 5.9 (8.5)         | -2.4 (-5.2)       |
| Tropical desert              | 3.1 (11)          | 7.9 (16.0)      | -4.6 (-10.6)    | 1.6 (6.3)         | 5.2 (9.9)       | -3.0 (-5.9)     | 1.8 (4.6)         | 4.3 (6)           | -2.5 (-7.5)       |
| Tropical dry forest          | 3.9 (7.9)         | 7.0 (10.7)      | -4.6 (-9.4)     | 1.6 (3.1)         | 3.2 (4.8)       | -2.4 (-4.6)     | 4.2 (6.5)         | 6 (7.6)           | -3 (-6.2)         |
| Tropical moist forest        | 5.6 (10.5)        | 8.2 (12.4)      | -4.4 (-12.6)    | 1.8 (3.3)         | 3.0 (4.5)       | -2.0 (-4.7)     | 4.5 (6.9)         | 6.1 (7.8)         | -3.2 (-6.9)       |
| Tropical mountain system     | 4.2 (7.3)         | 6.1 (8.6)       | -3.1 (-9.1)     | 1.2 (2)           | 2.1 (2.7)       | -1.5 (-3.3)     | 2.7 (4.3)         | 3.5 (4.5)         | -1.6 (-4.2)       |
| Tropical rainforest          | 7 (11.9)          | 8.9 (12.6)      | -2.2 (-6.9)     | 1.9 (3.2)         | 2.4 (3.5)       | -0.7 (-2.2)     | 5.8 (7.5)         | 6.6 (7.8)         | -2 (-5.4)         |
| Tropical shrubland           | 5.2 (8.4)         | 7.8 (10.5)      | -5.2 (-8.9)     | 3.2 (4.9)         | 4.7 (6.2)       | -2.5 (-4.1)     | 4 (5.8)           | 4.8 (6)           | -2 (-5)           |

Table S3: Percentage of significant trends (total, positive and negative) for FWI<sub>95</sub>, ISI<sub>95</sub> and VPD<sub>95</sub> for each continent/biome combination.

| Continent | Biome                               | FWI <sub>95</sub> |          |          | ISI <sub>95</sub> |          |          | VPD <sub>95</sub> |          |          |
|-----------|-------------------------------------|-------------------|----------|----------|-------------------|----------|----------|-------------------|----------|----------|
|           |                                     | all               | positive | negative | all               | positive | negative | all               | positive | negative |
| Africa    | Subtropical dry forest              | 51.4              | 51       | 0.4      | 55                | 54.6     | 0.4      | 74.1              | 73.9     | 0.2      |
| Africa    | Subtropical humid forest            | 56.5              | 56.5     | 0        | 64.9              | 64.9     | 0        | 77.1              | 77.1     | 0        |
| Africa    | Subtropical mountain system         | 90.3              | 90.3     | 0        | 91.4              | 91.4     | 0        | 96.2              | 96.2     | 0        |
| Africa    | Subtropical steppe                  | 13.4              | 12.9     | 0.5      | 14.6              | 14.1     | 0.5      | 60                | 60       | 0        |
| Africa    | Tropical desert                     | 78.5              | 76.4     | 2.1      | 78                | 76.1     | 2        | 85.6              | 84.6     | 1        |
| Africa    | Tropical dry forest north           | 32                | 31.3     | 0.7      | 31.5              | 29.5     | 2        | 63.5              | 63.4     | 0.1      |
| Africa    | Tropical dry forest south           | 50.6              | 47       | 3.6      | 48.9              | 45.8     | 3.1      | 92.7              | 89.6     | 3.1      |
| Africa    | Tropical moist forest north         | 32.8              | 32.5     | 0.3      | 26.7              | 25       | 1.7      | 52.5              | 50.1     | 2.4      |
| Africa    | Tropical moist forest south         | 30.7              | 30.1     | 0.6      | 30.4              | 29.6     | 0.8      | 56.6              | 55.5     | 1.1      |
| Africa    | Tropical mountain system east       | 58.8              | 58.8     | 0        | 57.9              | 57.9     | 0        | 79.5              | 79.3     | 0.2      |
| Africa    | Tropical mountain system west       | 44.7              | 44.7     | 0        | 39.5              | 38.2     | 1.3      | 65.8              | 65.8     | 0        |
| Africa    | Tropical rainforest                 | 71.2              | 68.9     | 2.3      | 62.9              | 60.3     | 2.6      | 85.9              | 84.5     | 1.4      |
| Africa    | Tropical shrubland north            | 63.5              | 63.2     | 0.3      | 62.6              | 62.3     | 0.3      | 80.9              | 80.8     | 0.1      |
| Africa    | Tropical shrubland south            | 78.9              | 77.9     | 1        | 72.4              | 71.3     | 1.1      | 98.2              | 97.9     | 0.3      |
| Asia      | Boreal coniferous forest            | 0.3               | 0.3      | 0        | 0                 | 0        | 0        | 68.2              | 68.2     | 0        |
| Asia      | Boreal mountain system              | 37.1              | 36.2     | 0.9      | 37.5              | 34.4     | 3.1      | 47.3              | 47.3     | 0        |
| Asia      | Subtropical desert                  | 35.1              | 29.8     | 5.3      | 35.1              | 29.8     | 5.3      | 80                | 80       | 0        |
| Asia      | Subtropical dry forest              | 32.9              | 28.6     | 4.3      | 38.2              | 35.3     | 2.9      | 62.8              | 62.8     | 0        |
| Asia      | Subtropical humid forest            | 6.7               | 6.7      | 0        | 16.3              | 16.2     | 0.1      | 66.5              | 66.4     | 0.1      |
| Asia      | Subtropical mountain system central | 6                 | 1.6      | 4.4      | 6.8               | 0.3      | 6.5      | 18.2              | 14.5     | 3.7      |
| Asia      | Subtropical mountain system east    | 0                 | 0        | 0        | 0                 | 0        | 0        | 97                | 97       | 0        |
| Asia      | Subtropical mountain system west    | 56.8              | 55.7     | 1.1      | 58.5              | 57.3     | 1.2      | 87.6              | 87.5     | 0.1      |
| Asia      | Subtropical steppe                  | 41.9              | 30.3     | 11.6     | 44.1              | 31       | 13.1     | 63                | 62.9     | 0.1      |
| Asia      | Temperate continental forest        | 15.9              | 15.9     | 0        | 12                | 12       | 0        | 47.6              | 47.6     | 0        |
| Asia      | Temperate desert                    | 18.8              | 18.6     | 0.2      | 16.4              | 14.4     | 2        | 51.8              | 50.2     | 1.6      |
| Asia      | Temperate mountain system           | 23                | 21.9     | 1.1      | 18.7              | 17.1     | 1.6      | 58.7              | 58.3     | 0.4      |
| Asia      | Temperate steppe east               | 30.5              | 30.3     | 0.2      | 24.3              | 21.7     | 2.6      | 57.8              | 57.8     | 0        |
| Asia      | Temperate steppe west               | 16.6              | 16.6     | 0        | 5.5               | 5.1      | 0.4      | 37.3              | 37.3     | 0        |

|               |                                      |      |      |      |      |      |      |      |      |      |
|---------------|--------------------------------------|------|------|------|------|------|------|------|------|------|
| Asia          | Tropical desert                      | 41.9 | 7    | 34.9 | 48.7 | 6    | 42.7 | 41.8 | 36.8 | 5    |
| Asia          | Tropical dry forest east             | 13   | 0.3  | 12.7 | 19.6 | 2.6  | 17   | 40.6 | 0.4  | 40.2 |
| Asia          | Tropical dry forest west             | 33.8 | 0    | 33.8 | 43   | 0    | 43   | 9.2  | 0.5  | 8.7  |
| Asia          | Tropical moist forest                | 25.7 | 0.1  | 25.6 | 44.5 | 1.1  | 43.4 | 23.4 | 2.2  | 21.2 |
| Asia          | Tropical mountain system             | 28.4 | 14.1 | 14.3 | 35.2 | 10.7 | 24.5 | 36.4 | 31.2 | 5.2  |
| Asia          | Tropical rainforest                  | 9.7  | 4.7  | 5    | 13.6 | 6.9  | 6.7  | 43.9 | 39.6 | 4.3  |
| Asia          | Tropical shrubland                   | 28.7 | 0.1  | 28.6 | 33.7 | 0.1  | 33.6 | 8.5  | 4.9  | 3.6  |
| Europe        | Boreal coniferous forest central     | 6.8  | 1.5  | 5.3  | 18.7 | 11.2 | 7.5  | 16.5 | 16.5 | 0    |
| Europe        | Boreal coniferous forest east        | 12.9 | 12.8 | 0.1  | 20.4 | 19.1 | 1.3  | 18.9 | 18.9 | 0    |
| Europe        | Boreal coniferous forest west        | 10.5 | 10.5 | 0    | 16.3 | 16.3 | 0    | 11.7 | 11.7 | 0    |
| Europe        | Boreal mountain system central       | 16.3 | 15.9 | 0.4  | 22.2 | 17.7 | 4.5  | 36.4 | 36.4 | 0    |
| Europe        | Boreal mountain system east          | 7.7  | 5.9  | 1.8  | 7.9  | 6.3  | 1.6  | 29.7 | 29.7 | 0    |
| Europe        | Boreal tundra woodland east          | 3.9  | 2.9  | 1    | 4.3  | 2.3  | 2    | 13.8 | 13.8 | 0    |
| Europe        | Boreal tundra woodland west          | 0.8  | 0.8  | 0    | 0.8  | 0.8  | 0    | 1.1  | 1.1  | 0    |
| Europe        | Polar                                | 0.9  | 0.9  | 0    | 2.1  | 1.2  | 0.9  | 9.2  | 5.8  | 3.4  |
| Europe        | Subtropical dry forest               | 47.8 | 47.3 | 0.5  | 53.2 | 52.6 | 0.6  | 76.9 | 76.9 | 0    |
| Europe        | Subtropical mountain system          | 57.8 | 57.4 | 0.4  | 58.2 | 58.2 | 0    | 71.3 | 71.3 | 0    |
| Europe        | Temperate continental forest central | 25.7 | 25.7 | 0    | 37.6 | 37.4 | 0.2  | 41.3 | 41.3 | 0    |
| Europe        | Temperate continental forest east    | 1.3  | 1.3  | 0    | 0.9  | 0.9  | 0    | 38.3 | 38.3 | 0    |
| Europe        | Temperate continental forest west    | 51.7 | 51.7 | 0    | 58.3 | 58.2 | 0.1  | 83.6 | 83.6 | 0    |
| Europe        | Temperate desert                     | 94.3 | 94.3 | 0    | 93   | 93   | 0    | 100  | 100  | 0    |
| Europe        | Temperate mountain system            | 17   | 16.2 | 0.9  | 17.1 | 16.5 | 0.6  | 58.2 | 58.2 | 0    |
| Europe        | Temperate oceanic forest Europe      | 6.2  | 5.8  | 0.4  | 12.7 | 12.4 | 0.3  | 83.3 | 83.2 | 0.1  |
| Europe        | Temperate steppe east                | 77.8 | 77.8 | 0    | 44.9 | 44.9 | 0    | 9.1  | 9.1  | 0    |
| Europe        | Temperate steppe west                | 89.2 | 89.2 | 0    | 83.8 | 83.8 | 0    | 90.1 | 90.1 | 0    |
| North America | Boreal coniferous forest east        | 3.6  | 3.6  | 0    | 10.8 | 10.8 | 0    | 43.4 | 43.4 | 0    |
| North America | Boreal coniferous forest west        | 0.2  | 0.1  | 0.1  | 6.2  | 5.9  | 0.3  | 7.3  | 5    | 2.3  |
| North America | Boreal mountain system               | 3.4  | 2.8  | 0.6  | 3.7  | 3.3  | 0.4  | 21.8 | 21.5 | 0.3  |
| North America | Boreal tundra                        | 4    | 1.5  | 2.5  | 2.9  | 1.9  | 1    | 20.6 | 20.6 | 0    |

|               |                                |      |      |      |      |      |      |      |      |      |
|---------------|--------------------------------|------|------|------|------|------|------|------|------|------|
|               | woodland east                  |      |      |      |      |      |      |      |      |      |
| North America | Boreal tundra woodland west    | 8.6  | 7.5  | 1.1  | 15.4 | 14.8 | 0.6  | 20.1 | 20   | 0.1  |
| North America | Polar                          | 4.9  | 3.7  | 1.2  | 3.2  | 2.3  | 0.9  | 51.6 | 49.5 | 2.1  |
| North America | Subtropical desert             | 59.2 | 59.2 | 0    | 51.1 | 51.1 | 0    | 66.4 | 66.3 | 0.1  |
| North America | Subtropical dry forest         | 87.3 | 87.3 | 0    | 87.3 | 87.3 | 0    | 74.7 | 74.7 | 0    |
| North America | Subtropical humid forest       | 10.8 | 10.7 | 0.1  | 22.4 | 22.3 | 0.1  | 24.1 | 24.1 | 0    |
| North America | Subtropical mountain system    | 45.5 | 45.4 | 0.1  | 44.3 | 43.7 | 0.6  | 46.6 | 46.1 | 0.5  |
| North America | Subtropical steppe             | 53.8 | 53.8 | 0    | 45.6 | 45.6 | 0    | 77.1 | 77.1 | 0    |
| North America | Temperate continental forest   | 0.2  | 0    | 0.2  | 1    | 0.6  | 0.4  | 10.7 | 10.5 | 0.2  |
| North America | Temperate desert               | 67.5 | 67.5 | 0    | 57.4 | 57.4 | 0    | 95.6 | 95.6 | 0    |
| North America | Temperate mountain system east | 3.9  | 3.9  | 0    | 2.6  | 2.6  | 0    | 29.9 | 29.9 | 0    |
| North America | Temperate mountain system west | 44   | 44   | 0    | 43.1 | 43   | 0.1  | 53.4 | 52.3 | 1.1  |
| North America | Temperate oceanic forest       | 12.4 | 12.4 | 0    | 6.2  | 6.2  | 0    | 16.5 | 16.5 | 0    |
| North America | Temperate steppe               | 7.6  | 7.2  | 0.4  | 11.9 | 10.9 | 1    | 15.1 | 8.2  | 6.9  |
| North America | Tropical dry forest            | 27.6 | 27.2 | 0.4  | 29.1 | 26   | 3.1  | 25.2 | 21.3 | 3.9  |
| North America | Tropical moist forest          | 42   | 40.4 | 1.6  | 39.4 | 32.2 | 7.2  | 50.3 | 43.5 | 6.8  |
| North America | Tropical mountain system       | 13.6 | 9.4  | 4.2  | 18.3 | 8    | 10.3 | 35.2 | 27.2 | 8    |
| North America | Tropical rainforest            | 23.3 | 19.9 | 3.4  | 26   | 20.2 | 5.9  | 33.6 | 26   | 7.6  |
| Oceania       | Subtropical desert             | 13.2 | 13.2 | 0    | 10   | 10   | 0.1  | 21.7 | 19.9 | 1.8  |
| Oceania       | Subtropical dry forest         | 25.7 | 14.4 | 11.3 | 34.6 | 20.2 | 14.4 | 47.5 | 33.1 | 14.4 |
| Oceania       | Subtropical humid forest Au    | 4.6  | 4.6  | 0    | 0.8  | 0.8  | 0    | 1.3  | 0.4  | 0.9  |
| Oceania       | Subtropical steppe east        | 78.8 | 78.8 | 0    | 67.4 | 67.4 | 0    | 71.9 | 71.9 | 0    |
| Oceania       | Subtropical steppe west        | 2.9  | 0    | 2.9  | 5.5  | 0    | 5.5  | 6.6  | 0.3  | 6.3  |
| Oceania       | Temperate mountain system      | 26.1 | 26.1 | 0    | 17   | 17   | 0    | 26.4 | 26.4 | 0    |
| Oceania       | Temperate oceanic forest       | 26.9 | 26.9 | 0    | 18.2 | 17.9 | 0.3  | 41.2 | 41.2 | 0    |
| Oceania       | Tropical desert east           | 10.6 | 10.6 | 0    | 1.5  | 1.5  | 0    | 1.9  | 1.9  | 0    |
| Oceania       | Tropical desert west           | 0.2  | 0    | 0.2  | 1.1  | 0.3  | 0.8  | 8.7  | 0.1  | 8.6  |
| Oceania       | Tropical dry forest            | 33.3 | 33.3 | 0    | 35.9 | 35.9 | 0    | 43.5 | 43.4 | 0.1  |
| Oceania       | Tropical moist forest          | 0    | 0    | 0    | 0    | 0    | 0    | 2.6  | 2.6  | 0    |
| Oceania       | Tropical mountain system       | 7.4  | 0    | 7.4  | 6.4  | 0    | 6.4  | 22.3 | 19.1 | 3.2  |
| Oceania       | Tropical rainforest            | 6.4  | 2.7  | 3.7  | 5.9  | 4.1  | 1.8  | 30.6 | 28.2 | 2.4  |
| Oceania       | Tropical shrubland             | 26.9 | 26.9 | 0    | 25   | 25   | 0    | 24.4 | 22.5 | 1.9  |
| South America | Subtropical dry forest         | 41.6 | 41   | 0.6  | 44.1 | 43.5 | 0.6  | 80.7 | 78.8 | 1.9  |
| South America | Subtropical humid forest       | 45.7 | 45.7 | 0    | 45   | 45   | 0    | 45.1 | 45.1 | 0    |

|               |                               |      |      |     |      |      |     |      |      |     |
|---------------|-------------------------------|------|------|-----|------|------|-----|------|------|-----|
| South America | Subtropical mountain system   | 25.1 | 25.1 | 0   | 22.1 | 22.1 | 0   | 45.7 | 45.7 | 0   |
| South America | Subtropical steppe            | 43.1 | 43.1 | 0   | 33.9 | 33.9 | 0   | 58.1 | 58.1 | 0   |
| South America | Temperate mountain system     | 12.1 | 12.1 | 0   | 17.1 | 17.1 | 0   | 58   | 58   | 0   |
| South America | Temperate oceanic forest      | 5.9  | 5.5  | 0.4 | 7.1  | 7.1  | 0   | 34.1 | 32.9 | 1.2 |
| South America | Temperate steppe              | 51.8 | 51.8 | 0   | 62.9 | 62.9 | 0   | 80.7 | 80.7 | 0   |
| South America | Tropical desert               | 54.9 | 50   | 4.9 | 62.2 | 57.3 | 4.9 | 20.7 | 15.8 | 4.9 |
| South America | Tropical dry forest east      | 48.9 | 48.4 | 0.5 | 49.9 | 49.2 | 0.7 | 57.9 | 54.3 | 3.6 |
| South America | Tropical dry forest north     | 11.5 | 11.5 | 0   | 15.6 | 15.6 | 0   | 75.4 | 75.4 | 0   |
| South America | Tropical dry forest south     | 90.9 | 90.9 | 0   | 74.7 | 74.7 | 0   | 94.4 | 94.4 | 0   |
| South America | Tropical moist forest north   | 11.8 | 11.8 | 0   | 22.2 | 22   | 0.2 | 45.2 | 45.2 | 0   |
| South America | Tropical moist forest south   | 90.7 | 90.7 | 0   | 86.6 | 86.6 | 0   | 97.4 | 97.4 | 0   |
| South America | Tropical mountain system east | 92.5 | 92.5 | 0   | 93   | 93   | 0   | 97.2 | 97.2 | 0   |
| South America | Tropical mountain system west | 43.1 | 42.8 | 0.3 | 45.3 | 44.8 | 0.5 | 58.9 | 58   | 0.9 |
| South America | Tropical rainforest           | 70.4 | 70.4 | 0   | 70.7 | 70.7 | 0   | 86   | 86   | 0   |
| South America | Tropical shrubland            | 7.5  | 3.8  | 3.8 | 10   | 6.3  | 3.8 | 20   | 18.8 | 1.2 |

Table S4: Mean trend size (per 41 yr) of trends (total, positive and negative) for FWI<sub>95</sub>, ISI<sub>95</sub> and VPD<sub>95</sub> for each continent/biome combination. Values in parentheses are the corresponding mean trend sizes for significant trends only.

| Continent | biome                               | FWI <sub>95</sub> |             |              | ISI <sub>95</sub> |             |             | VPD <sub>95</sub> |            |              |
|-----------|-------------------------------------|-------------------|-------------|--------------|-------------------|-------------|-------------|-------------------|------------|--------------|
|           |                                     | all               | positive    | negative     | all               | positive    | negative    | all               | positive   | negative     |
| Africa    | Subtropical dry forest              | 5.9 (8.7)         | 6.0 (8.7)   | -2.9 (-3.6)  | 2.4 (3.4)         | 2.5 (3.4)   | -0.5 (-1.0) | 5.9 (71.6)        | 6.1 (71.8) | -0.4 (-4.9)  |
| Africa    | Subtropical humid forest            | 12.7 (15.7)       | 12.8 (15.7) | -            | 5.1 (6.4)         | 5.2 (6.4)   | -           | 5.5 (66.2)        | 5.6 (66.2) | -            |
| Africa    | Subtropical mountain system         | 23.6 (25.8)       | 23.7 (25.8) | -            | 11.9 (12.9)       | 11.9 (12.9) | -           | 8.9 (92.1)        | 9.0 (92.1) | -            |
| Africa    | Subtropical steppe                  | 3.0 (8.0)         | 4.0 (8.2)   | -1.3 (-3.0)  | 1.7 (3.9)         | 2.3 (4.0)   | -0.7 (-1.2) | 5.7 (71.9)        | 5.8 (71.9) | -            |
| Africa    | Tropical desert                     | 11.8 (16.5)       | 13.1 (16.7) | -3.6 (-5.1)  | 7.4 (10.1)        | 8.3 (10.2)  | -2.2 (-1.9) | 4.9 (54.9)        | 5.1 (56.0) | -2.0 (-43.4) |
| Africa    | Tropical dry forest north           | 3.5 (8.6)         | 5.1 (8.9)   | -1.4 (-5.1)  | 1.7 (4.6)         | 3.2 (5.2)   | -1.3 (-3.6) | 5.5 (76.9)        | 6.0 (77.3) | -1.4 (-65.9) |
| Africa    | Tropical dry forest south           | 5.8 (9.0)         | 6.7 (10.1)  | -3.2 (-6.1)  | 3.0 (4.8)         | 3.3 (5.3)   | -0.9 (-1.7) | 6.6 (70.2)        | 7.1 (74.4) | -3.6 (-53.7) |
| Africa    | Tropical moist forest north         | 4.0 (9.8)         | 5.8 (10.0)  | -1.7 (-4.5)  | 1.2 (3.7)         | 2.4 (4.2)   | -1.2 (-2.6) | 3.4 (56.7)        | 4.5 (61.0) | -1.6 (-34.7) |
| Africa    | Tropical moist forest south         | 3.1 (6.2)         | 3.7 (6.4)   | -1.3 (-5.1)  | 1.4 (2.9)         | 1.7 (3.1)   | -0.6 (-1.6) | 2.7 (37.9)        | 2.9 (39.3) | -1.4 (-35.8) |
| Africa    | Tropical mountain system east       | 6.6 (9.1)         | 7.0 (9.1)   | -            | 2.0 (2.7)         | 2.1 (2.7)   | -           | 4.3 (51.6)        | 4.6 (51.8) | -0.8 (-32.2) |
| Africa    | Tropical mountain system west       | 5.1 (8.8)         | 5.5 (8.8)   | -            | 1.3 (2.1)         | 1.7 (2.3)   | -0.8 (-2.4) | 5.0 (65.1)        | 5.2 (65.1) | -            |
| Africa    | Tropical rainforest                 | 9.6 (12.5)        | 10.9 (13.2) | -2.0 (-5.4)  | 2.3 (3.1)         | 2.7 (3.3)   | -0.6 (-1.6) | 6.3 (70.6)        | 6.7 (72.9) | -3.1 (-74.4) |
| Africa    | Tropical shrubland north            | 6.6 (8.9)         | 7.0 (9.0)   | -1.4 (-6.3)  | 4.0 (5.1)         | 4.4 (5.2)   | -1.1 (-4.4) | 4.2 (47.3)        | 4.2 (47.4) | -1.2 (-33.8) |
| Africa    | Tropical shrubland south            | 12.1 (14.2)       | 12.4 (14.4) | -5.1 (-5.7)  | 7.2 (9.1)         | 7.4 (9.2)   | -1.9 (-2.1) | 9.5 (96.6)        | 9.6 (97.1) | -2.3 (-41.8) |
| Asia      | Boreal coniferous forest            | 3.1 (6.4)         | 3.1 (6.4)   | -            | -                 | -           | -           | 2.6 (27.7)        | 2.6 (27.7) | -            |
| Asia      | Boreal mountain system              | 4.7 (10.8)        | 6.1 (11.2)  | -2.2 (-5.0)  | 1.7 (4.1)         | 2.6 (4.7)   | -1.1 (-2.5) | 3.1 (57.3)        | 3.7 (57.3) | -            |
| Asia      | Subtropical desert                  | 3.2 (4.5)         | 6.3 (4.5)   | -            | 2.8 (3.1)         | 5.6 (3.1)   | -           | 7.6 (82.2)        | 7.6 (82.2) | -            |
| Asia      | Subtropical dry forest              | 2.4 (6.3)         | 5.0 (8.2)   | -2.5 (-5.3)  | 1.5 (3.3)         | 2.3 (3.7)   | -1.0 (-2.4) | 4.4 (64.5)        | 5.0 (64.5) | -            |
| Asia      | Subtropical humid forest            | 1.7 (5.9)         | 2.6 (5.9)   | -            | 0.5 (1.9)         | 0.9 (1.9)   | -0.5 (-1.2) | 3.7 (48.7)        | 3.9 (48.7) | -0.5 (-8.9)  |
| Asia      | Subtropical mountain system central | -0.3 (-1.4)       | 2.6 (10.0)  | -1.7 (-4.4)  | -0.5 (-2.6)       | 0.8 (2.7)   | -1.0 (-2.7) | 0.8 (34.6)        | 2.2 (50.9) | -0.9 (-28.3) |
| Asia      | Subtropical mountain system east    | 2.5 (4.8)         | 5.1 (4.8)   | -            | 2.0 (3.9)         | 4.1 (3.9)   | -           | 4.4 (44.5)        | 4.4 (44.5) | -            |
| Asia      | Subtropical mountain system west    | 6.4 (9.2)         | 7.2 (9.3)   | -3.2 (-5.2)  | 3.0 (4.1)         | 3.4 (4.1)   | -1.5 (-2.0) | 6.3 (70.3)        | 6.5 (70.4) | -1.3 (-37.8) |
| Asia      | Subtropical steppe                  | 1.4 (4.3)         | 5.1 (6.1)   | -4.4 (-9.6)  | 1.2 (2.6)         | 3.7 (3.8)   | -2.1 (-4.4) | 4.8 (71.8)        | 6.2 (72.0) | -1.8 (-33.8) |
| Asia      | Temperate continental forest        | 3.1 (9.0)         | 4.7 (9.0)   | -            | 0.9 (3.0)         | 1.5 (3.0)   | -           | 2.9 (43.9)        | 3.2 (43.9) | -            |
| Asia      | Temperate desert                    | 3.6 (11.7)        | 6.1 (11.7)  | -            | 1.1 (3.6)         | 2.7 (4.8)   | -1.7 (-4.1) | 4.3 (75.2)        | 5.7 (79.0) | -1.9 (-47.4) |
| Asia      | Temperate mountain system           | 3.0 (9.8)         | 5.2 (10.2)  | -1.7 (-4.4)  | 0.9 (3.2)         | 1.8 (3.5)   | -0.9 (-2.0) | 2.6 (40.1)        | 3.1 (40.5) | -0.7 (-15.9) |
| Asia      | Temperate steppe east               | 6.7 (15.2)        | 9.4 (15.5)  | -4.9 (-14.7) | 2.0 (5.7)         | 4.2 (7.0)   | -2.6 (-6.4) | 4.5 (64.2)        | 5.0 (64.2) | -            |
| Asia      | Temperate steppe west               | 2.7 (12.2)        | 6.8 (12.2)  | -            | 0.8 (4.3)         | 2.1 (4.8)   | -1.2 (-2.9) | 4.2 (83.7)        | 5.1 (83.7) | -            |
| Asia      | Tropical desert                     | -5.2 (-10.3)      | 4.7 (9.8)   | -7.7 (-10.9) | -3.3 (-5.9)       | 2.6 (3.2)   | -4.7 (-6.1) | 3.0 (56.4)        | 5.2 (74.0) | -3.2 (-74.4) |
| Asia      | Tropical dry forest east            | -1.9 (-6.9)       | 1.7 (5.2)   | -3.4 (-7.0)  | -0.7 (-2.2)       | 0.8 (1.5)   | -1.5 (-2.7) | -3.5 (-64.8)      | 1.4 (51.6) | -4.4 (-66.2) |
| Asia      | Tropical dry forest west            | -7.3 (-10.9)      | -           | -7.4 (-10.9) | -3.9 (-5.6)       | -           | -4.0 (-5.6) | -1.6 (-70.7)      | 1.4 (40.7) | -3.2 (-76.6) |
| Asia      | Tropical moist forest               | -5.5 (-13.1)      | 1.2 (1.6)   | -6.7 (-13.2) | -2.6 (-4.9)       | 0.7 (1.8)   | -3.2 (-5.0) | -3.0 (-69.9)      | 1.4 (25.5) | -4.4 (-79.8) |
| Asia      | Tropical mountain system            | -0.5 (-2.3)       | 3.8 (7.9)   | -4.7 (-9.7)  | -0.6 (-1.9)       | 1.7 (2.6)   | -1.9 (-3.4) | 0.6 (22.7)        | 2.3 (34.5) | -2.1 (-47.0) |
| Asia      | Tropical rainforest                 | 0.2 (-2.4)        | 2.2 (3.8)   | -2.5 (-8.2)  | 0.1 (-0.5)        | 0.7 (1.5)   | -0.9 (-2.6) | 1.2 (20.9)        | 2.3 (29.1) | -2.3 (-54.4) |

|               |                                      |             |             |              |             |             |             |              |              |              |
|---------------|--------------------------------------|-------------|-------------|--------------|-------------|-------------|-------------|--------------|--------------|--------------|
| Asia          | Tropical shrubland                   | -5.7 (-9.1) | -           | -6.0 (-9.1)  | -2.8 (-4.1) | -           | -2.9 (-4.1) | 0.3 (3.4)    | 2.3 (45.9)   | -2.2 (-53.2) |
| Europe        | Boreal coniferous forest central     | 1.6 (-3.1)  | 2.8 (6.2)   | -3.5 (-5.5)  | 0.7 (0.3)   | 1.1 (2.1)   | -1.5 (-2.2) | 2.8 (38.4)   | 2.8 (38.4)   | -            |
| Europe        | Boreal coniferous forest east        | 3.0 (6.3)   | 3.5 (6.3)   | -1.6 (-5.4)  | 0.8 (1.6)   | 1.2 (1.9)   | -0.7 (-1.7) | 2.6 (39.1)   | 2.6 (39.1)   | -            |
| Europe        | Boreal coniferous forest west        | 1.9 (7.2)   | 3.9 (7.2)   | -            | 0.8 (2.3)   | 1.4 (2.3)   | -           | 2.2 (34.1)   | 2.3 (34.1)   | -            |
| Europe        | Boreal mountain system central       | 2.0 (6.2)   | 3.2 (6.5)   | -1.7 (-5.4)  | 0.5 (1.6)   | 1.2 (2.4)   | -0.8 (-2.0) | 2.7 (41.5)   | 2.8 (41.5)   | -            |
| Europe        | Boreal mountain system east          | 1.2 (2.6)   | 2.0 (4.3)   | -1.5 (-3.0)  | 0.5 (1.0)   | 0.7 (1.6)   | -0.4 (-1.1) | 1.8 (28.5)   | 2.0 (28.5)   | -            |
| Europe        | Boreal tundra woodland east          | 0.3 (1.7)   | 1.9 (4.2)   | -1.6 (-5.9)  | 0.0 (0.0)   | 0.7 (1.5)   | -0.6 (-1.6) | 1.6 (32.9)   | 1.8 (32.9)   | -            |
| Europe        | Boreal tundra woodland west          | 1.3 (5.8)   | 2.1 (5.8)   | -            | 0.3 (2.6)   | 0.9 (2.6)   | -           | 1.6 (44.3)   | 1.8 (44.3)   | -            |
| Europe        | Polar                                | 0.4 (2.4)   | 1.8 (5.2)   | -1.0 (-4.3)  | -0.3 (-0.7) | 0.8 (2.2)   | -0.8 (-2.5) | -0.2 (10.8)  | 1.3 (26.5)   | -1.3 (-16.4) |
| Europe        | Subtropical dry forest               | 5.4 (8.5)   | 6.1 (8.6)   | -2.0 (-6.4)  | 2.0 (3.1)   | 2.2 (3.1)   | -0.7 (-2.0) | 6.2 (73.8)   | 6.3 (73.8)   | -            |
| Europe        | Subtropical mountain system          | 6.8 (9.8)   | 7.6 (9.9)   | -1.9 (-5.1)  | 2.2 (3.1)   | 2.3 (3.1)   | -           | 5.8 (72.3)   | 5.9 (72.3)   | -            |
| Europe        | Temperate continental forest central | 5.3 (11.6)  | 6.4 (11.6)  | -            | 2.7 (5.0)   | 3.2 (5.0)   | -0.8 (-3.2) | 4.0 (51.5)   | 4.0 (51.5)   | -            |
| Europe        | Temperate continental forest east    | 1.7 (5.2)   | 3.2 (5.2)   | -            | 0.7 (0.9)   | 1.4 (0.9)   | -           | 1.8 (29.5)   | 2.3 (29.5)   | -            |
| Europe        | Temperate continental forest west    | 8.7 (13.5)  | 9.2 (13.5)  | -            | 2.5 (3.7)   | 2.8 (3.7)   | -0.5 (-1.4) | 6.9 (76.2)   | 6.9 (76.2)   | -            |
| Europe        | Temperate desert                     | 26.6 (28.1) | 26.6 (28.1) | -            | 12.2 (13.1) | 12.2 (13.1) | -           | 11.8 (118.1) | 11.8 (118.1) | -            |
| Europe        | Temperate mountain system            | 1.8 (6.1)   | 3.2 (6.5)   | -1.2 (-2.7)  | 0.5 (1.7)   | 0.9 (1.8)   | -0.4 (-1.5) | 3.1 (44.4)   | 3.4 (44.4)   | -            |
| Europe        | Temperate oceanic forest Europe      | 3.4 (8.5)   | 4.2 (9.6)   | -2.1 (-8.4)  | 1.0 (2.2)   | 1.2 (2.3)   | -0.6 (-1.7) | 6.3 (71.1)   | 6.3 (71.2)   | -0.4 (-4.1)  |
| Europe        | Temperate steppe east                | 13.3 (15.5) | 13.4 (15.5) | -            | 4.4 (7.0)   | 4.7 (7.0)   | -           | 1.8 (39.4)   | 1.9 (39.4)   | -            |
| Europe        | Temperate steppe west                | 21.4 (23.3) | 21.5 (23.3) | -            | 7.3 (8.3)   | 7.3 (8.3)   | -           | 11.3 (122.4) | 11.3 (122.4) | -            |
| North America | Boreal coniferous forest east        | 2.2 (5.7)   | 2.4 (5.9)   | -0.6 (-2.0)  | 1.3 (2.7)   | 1.4 (2.7)   | -           | 2.5 (32.5)   | 2.5 (32.5)   | -            |
| North America | Boreal coniferous forest west        | 0.6 (-3.1)  | 2.2 (2.7)   | -1.8 (-6.0)  | 0.6 (2.0)   | 1.1 (2.2)   | -0.6 (-2.0) | 0.6 (5.3)    | 1.4 (32.5)   | -1.6 (-53.2) |
| North America | Boreal mountain system               | 0.8 (4.7)   | 2.0 (6.5)   | -1.1 (-4.1)  | 0.2 (1.8)   | 0.6 (2.1)   | -0.5 (-1.6) | 1.6 (31.8)   | 1.9 (32.5)   | -0.7 (-18.9) |
| North America | Boreal tundra woodland east          | 0.6 (-0.8)  | 2.1 (4.6)   | -1.7 (-4.8)  | 0.2 (0.7)   | 0.9 (2.5)   | -0.9 (-3.0) | 1.7 (30.0)   | 1.8 (30.0)   | -            |
| North America | Boreal tundra woodland west          | 2.2 (7.7)   | 3.3 (9.7)   | -1.8 (-5.7)  | 0.9 (2.7)   | 1.3 (2.9)   | -0.5 (-1.9) | 1.8 (38.2)   | 2.2 (38.7)   | -0.9 (-35.9) |
| North America | Polar                                | 0.6 (3.9)   | 3.7 (7.9)   | -0.7 (-7.3)  | 0.2 (1.5)   | 1.5 (3.3)   | -0.3 (-2.9) | 0.7 (9.8)    | 1.1 (12.0)   | -1.7 (-40.4) |
| North America | Subtropical desert                   | 9.5 (13.3)  | 9.6 (13.3)  | -            | 4.6 (7.4)   | 4.9 (7.4)   | -           | 5.0 (64.8)   | 5.3 (65.0)   | -0.8 (-26.7) |
| North America | Subtropical dry forest               | 8.9 (9.2)   | 8.9 (9.2)   | -            | 3.6 (3.7)   | 3.6 (3.7)   | -           | 7.8 (89.9)   | 7.8 (89.9)   | -            |
| North America | Subtropical humid forest             | 2.8 (7.5)   | 3.6 (7.6)   | -1.6 (-3.1)  | 0.9 (1.9)   | 1.0 (1.9)   | -0.3 (-1.4) | 2.8 (58.4)   | 3.2 (58.4)   | -            |
| North America | Subtropical mountain system          | 9.1 (16.0)  | 10.6 (16.0) | -1.3 (-3.3)  | 3.8 (7.3)   | 4.5 (7.4)   | -0.5 (-1.3) | 3.5 (59.4)   | 4.1 (60.4)   | -1.1 (-33.7) |
| North America | Subtropical steppe                   | 14.0 (21.2) | 14.3 (21.2) | -            | 6.2 (10.5)  | 6.5 (10.5)  | -           | 6.9 (79.6)   | 6.9 (79.6)   | -            |
| North America | Temperate continental forest         | 0.8 (-5.4)  | -           | -1.3 (-5.4)  | 0.3 (0.3)   | 0.6 (1.5)   | -0.5 (-1.7) | 1.7 (29.2)   | 1.8 (30.0)   | -0.5 (-18.9) |
| North America | Temperate desert                     | 10.3 (12.8) | 10.3 (12.8) | -            | 4.2 (5.5)   | 4.3 (5.5)   | -           | 7.0 (72.0)   | 7.0 (72.0)   | -            |
| North America | Temperate mountain system east       | 1.8 (4.0)   | 2.0 (4.0)   | -            | 0.7 (1.9)   | 0.8 (1.9)   | -           | 1.6 (19.9)   | 1.6 (19.9)   | -            |
| North America | Temperate mountain system west       | 7.0 (15.0)  | 10.0 (15.0) | -1.4 (-3.8)  | 2.2 (4.8)   | 3.2 (4.9)   | -0.5 (-1.1) | 3.8 (62.8)   | 4.6 (64.5)   | -1.0 (-21.7) |
| North America | Temperate oceanic forest             | 2.1 (6.6)   | 2.5 (6.6)   | -            | 0.2 (1.5)   | 0.5 (1.5)   | -           | 2.4 (72.5)   | 2.7 (72.5)   | -            |
| North America | Temperate steppe                     | 0.3 (14.1)  | 5.5 (15.4)  | -4.0 (-12.2) | 1.0 (6.0)   | 2.6 (6.9)   | -1.5 (-4.0) | -0.4 (4.3)   | 2.7 (52.1)   | -2.7 (-52.2) |
| North America | Tropical dry forest                  | 3.1 (8.1)   | 5.3 (8.4)   | -1.6 (-9.2)  | 1.1 (3.0)   | 2.1 (3.7)   | -0.8 (-2.6) | 1.3 (28.3)   | 2.8 (42.0)   | -1.6 (-46.9) |
| North America | Tropical moist forest                | 4.8 (8.5)   | 6.2 (9.2)   | -3.0 (-7.9)  | 0.7 (1.5)   | 1.6 (2.4)   | -1.4 (-3.0) | 2.4 (43.6)   | 4.0 (58.9)   | -2.9 (-52.6) |
| North America | Tropical mountain system             | 1.6 (4.9)   | 4.9 (9.5)   | -3.3 (-6.5)  | -0.1 (-0.1) | 1.1 (2.3)   | -1.3 (-2.2) | 1.1 (26.4)   | 2.9 (47.4)   | -1.8 (-45.3) |

|               |                               |             |             |             |             |           |             |              |             |              |
|---------------|-------------------------------|-------------|-------------|-------------|-------------|-----------|-------------|--------------|-------------|--------------|
| North America | Tropical rainforest           | 2.8 (6.9)   | 5.0 (8.8)   | -3.1 (-5.1) | 0.5 (1.3)   | 1.1 (2.1) | -0.7 (-1.5) | 2.2 (48.2)   | 3.8 (72.5)  | -1.6 (-35.7) |
| Oceania       | Subtropical desert            | 4.5 (14.9)  | 5.9 (14.9)  | -           | 2.2 (9.1)   | 3.6 (9.2) | -1.5 (-4.7) | 2.0 (66.8)   | 4.4 (80.2)  | -2.3 (-83.0) |
| Oceania       | Subtropical dry forest        | 2.7 (5.2)   | 5.8 (14.6)  | -4.2 (-6.2) | 1.3 (2.2)   | 3.0 (5.8) | -1.8 (-2.9) | 1.8 (29.3)   | 4.6 (64.7)  | -3.2 (-52.1) |
| Oceania       | Subtropical humid forest Au   | 5.6 (10.1)  | 5.7 (10.1)  | -           | 1.3 (1.4)   | 1.4 (1.4) | -           | 0.8 (-7.4)   | 1.6 (42.6)  | -1.2 (-32.4) |
| Oceania       | Subtropical steppe east       | 13.5 (15.1) | 13.5 (15.1) | -           | 6.3 (8.1)   | 6.4 (8.1) | -           | 8.8 (108.9)  | 9.0 (108.9) | -            |
| Oceania       | Subtropical steppe west       | -0.5 (-5.6) | -           | -2.7 (-5.6) | -0.4 (-3.3) | -         | -1.6 (-3.3) | 0.0 (-59.4)  | 2.4 (48.3)  | -2.8 (-64.2) |
| Oceania       | Temperate mountain system     | 4.5 (4.0)   | 4.7 (4.0)   | -           | 1.3 (1.6)   | 1.5 (1.6) | -           | 2.5 (32.6)   | 2.8 (32.6)  | -            |
| Oceania       | Temperate oceanic forest      | 2.2 (3.5)   | 2.9 (3.5)   | -           | 0.7 (1.4)   | 1.2 (1.5) | -0.7 (-3.1) | 1.9 (30.2)   | 2.4 (30.2)  | -            |
| Oceania       | Tropical desert east          | 3.4 (8.7)   | 4.2 (8.7)   | -           | 0.6 (4.5)   | 1.7 (4.5) | -           | 1.4 (47.2)   | 2.0 (47.2)  | -            |
| Oceania       | Tropical desert west          | 0.2 (-5.9)  | -           | -1.7 (-5.9) | -0.5 (-1.9) | 1.4 (4.0) | -1.9 (-4.2) | -2.0 (-79.3) | 1.2 (48.9)  | -2.5 (-81.4) |
| Oceania       | Tropical dry forest           | 4.9 (6.8)   | 5.1 (6.8)   | -           | 2.7 (3.4)   | 2.7 (3.4) | -           | 3.2 (60.5)   | 4.0 (60.7)  | -1.2 (-22.3) |
| Oceania       | Tropical moist forest         | -           | -           | -           | -           | -         | -           | -1.4 (8.8)   | 0.6 (8.8)   | -            |
| Oceania       | Tropical mountain system      | -0.4 (-1.1) | -           | -0.5 (-1.1) | -0.3 (-0.6) | -         | -0.3 (-0.6) | 0.2 (6.5)    | 0.6 (10.4)  | -0.7 (-16.5) |
| Oceania       | Tropical rainforest           | -0.7 (-2.6) | 1.2 (2.2)   | -1.6 (-6.2) | -0.2 (0.0)  | 0.5 (0.8) | -0.5 (-2.0) | 0.4 (16.9)   | 1.2 (19.8)  | -0.9 (-17.3) |
| Oceania       | Tropical shrubland            | 5.5 (8.0)   | 5.6 (8.0)   | -           | 2.5 (3.6)   | 2.6 (3.6) | -           | 2.1 (50.1)   | 3.1 (58.3)  | -1.7 (-47.0) |
| South America | Subtropical dry forest        | 3.6 (5.6)   | 3.8 (5.6)   | -           | 1.1 (1.7)   | 1.2 (1.7) | -0.5 (-0.8) | 3.5 (40.4)   | 3.6 (41.5)  | -0.4 (-6.3)  |
| South America | Subtropical humid forest      | 6.2 (12.4)  | 8.0 (12.4)  | -           | 2.0 (4.0)   | 2.5 (4.0) | -           | 2.8 (52.5)   | 3.7 (52.5)  | -            |
| South America | Subtropical mountain system   | 4.4 (8.8)   | 5.1 (8.8)   | -           | 1.3 (2.5)   | 1.7 (2.5) | -           | 1.4 (23.4)   | 1.6 (23.4)  | -            |
| South America | Subtropical steppe            | 10.3 (16.9) | 10.4 (16.9) | -           | 3.2 (6.2)   | 3.5 (6.2) | -           | 4.4 (64.0)   | 4.4 (64.0)  | -            |
| South America | Temperate mountain system     | 1.4 (4.6)   | 2.0 (4.6)   | -           | 0.6 (1.8)   | 0.9 (1.8) | -           | 2.0 (26.7)   | 2.0 (26.7)  | -            |
| South America | Temperate oceanic forest      | 0.9 (5.1)   | 1.2 (5.4)   | -0.3 (-3.3) | 0.4 (2.5)   | 0.6 (2.5) | -           | 1.2 (21.9)   | 1.4 (22.9)  | -0.1 (-5.1)  |
| South America | Temperate steppe              | 7.7 (10.1)  | 7.8 (10.1)  | -           | 4.9 (6.5)   | 5.0 (6.5) | -           | 3.2 (36.2)   | 3.3 (36.2)  | -            |
| South America | Tropical desert               | 2.7 (2.7)   | 3.7 (4.5)   | -1.5 (-2.6) | 1.1 (0.9)   | 1.6 (1.2) | -0.3 (-0.7) | 0.4 (15.7)   | 0.9 (23.8)  | -0.4 (-11.0) |
| South America | Tropical dry forest east      | 4.4 (7.6)   | 5.5 (7.7)   | -1.5 (-3.3) | 1.9 (3.3)   | 2.4 (3.3) | -0.8 (-1.9) | 3.6 (59.7)   | 4.9 (65.3)  | -1.3 (-23.5) |
| South America | Tropical dry forest north     | 3.1 (8.1)   | 4.0 (8.1)   | -           | 0.6 (1.9)   | 1.0 (1.9) | -           | 3.7 (47.4)   | 4.3 (47.4)  | -            |
| South America | Tropical dry forest south     | 15.1 (15.8) | 15.1 (15.8) | -           | 5.0 (5.7)   | 5.0 (5.7) | -           | 9.3 (95.4)   | 9.3 (95.4)  | -            |
| South America | Tropical moist forest north   | 3.2 (9.5)   | 4.1 (9.5)   | -           | 1.0 (2.6)   | 1.5 (2.7) | -0.7 (-1.8) | 4.1 (71.7)   | 4.7 (71.7)  | -            |
| South America | Tropical moist forest south   | 13.7 (14.6) | 13.8 (14.6) | -           | 4.7 (5.1)   | 4.8 (5.1) | -           | 9.9 (101.2)  | 9.9 (101.2) | -            |
| South America | Tropical mountain system east | 14.5 (15.5) | 14.5 (15.5) | -           | 4.6 (4.9)   | 4.6 (4.9) | -           | 9.6 (98.4)   | 9.6 (98.4)  | -            |
| South America | Tropical mountain system west | 4.2 (6.0)   | 5.1 (6.1)   | -1.5 (-7.2) | 1.4 (2.2)   | 1.9 (2.2) | -1.1 (-1.8) | 2.1 (30.9)   | 2.4 (31.9)  | -0.9 (-31.4) |
| South America | Tropical rainforest           | 9.5 (12.7)  | 9.9 (12.7)  | -           | 2.8 (3.7)   | 2.9 (3.7) | -0.4 (-1.1) | 8.3 (92.9)   | 8.4 (92.9)  | -0.7 (-25.1) |
| South America | Tropical shrubland            | 0.2 (-3.4)  | -           | -1.4 (-3.4) | 0.0 (-0.4)  | 0.7 (0.4) | -0.5 (-0.8) | 0.5 (19.3)   | 1.1 (21.0)  | -0.9 (-6.4)  |

Table S5: Percentage of significant trends of FWI<sub>95</sub> and ISI<sub>95</sub> that are identified with changes in each input variable: temperature (T), precipitation (P), relative humidity (RH) and wind speed (WS), as well as Vapor Pressure Deficit (VPD).

| Continent | Biome                               | FWI <sub>95</sub> |      |      |      |      | ISI <sub>95</sub> |      |      |      |      |
|-----------|-------------------------------------|-------------------|------|------|------|------|-------------------|------|------|------|------|
|           |                                     | T                 | P    | RH   | WS   | VPD  | T                 | P    | RH   | WS   | VPD  |
| Africa    | Subtropical dry forest              | 28.7              | 0.8  | 62   | 7.8  | 35.3 | 21.7              | 4.3  | 62.3 | 5.4  | 33.3 |
| Africa    | Subtropical humid forest            | 59.5              | 4.1  | 93.2 | 24.3 | 82.4 | 32.9              | 2.4  | 94.1 | 16.5 | 69.4 |
| Africa    | Subtropical mountain system         | 16.1              | 0.4  | 85.5 | 5.6  | 40.7 | 7.6               | 0.8  | 69.1 | 3.8  | 16.9 |
| Africa    | Subtropical steppe                  | 46.6              | 3.4  | 65.5 | 13.8 | 58.6 | 50.8              | 6.3  | 77.8 | 14.3 | 60.3 |
| Africa    | Tropical desert                     | 8.5               | 0.8  | 49.9 | 3.7  | 18.5 | 10.4              | 0.9  | 58.5 | 3.4  | 19.7 |
| Africa    | Tropical dry forest north           | 79.1              | 1.9  | 27   | 49   | 84.1 | 78.3              | 1.8  | 32.6 | 41.8 | 83.6 |
| Africa    | Tropical dry forest south           | 37.1              | 6.9  | 82.1 | 6.6  | 57.9 | 39.2              | 8.4  | 85.3 | 7.3  | 58.1 |
| Africa    | Tropical moist forest north         | 49.8              | 3.6  | 51.4 | 34   | 78   | 68.7              | 5.3  | 70.4 | 33.5 | 80.5 |
| Africa    | Tropical moist forest south         | 38.4              | 8.9  | 67.5 | 28   | 65.7 | 40                | 10.7 | 68.5 | 28.5 | 61.5 |
| Africa    | Tropical mountain system east       | 78.2              | 24.8 | 67.4 | 19   | 87.9 | 72                | 25.5 | 72.4 | 18.4 | 84.3 |
| Africa    | Tropical mountain system west       | 85.3              | 11.8 | 88.2 | 23.5 | 97.1 | 83.3              | 10   | 80   | 13.3 | 96.7 |
| Africa    | Tropical rainforest                 | 63.4              | 21.4 | 64.4 | 7.5  | 81.7 | 77.5              | 38.9 | 93   | 14.6 | 91.6 |
| Africa    | Tropical shrubland north            | 21.3              | 3.3  | 36.7 | 22.2 | 39.7 | 20.8              | 3.7  | 37.7 | 20.9 | 37   |
| Africa    | Tropical shrubland south            | 15.1              | 1.2  | 62.6 | 2.4  | 35.5 | 12.5              | 1.7  | 68.2 | 2.2  | 34.3 |
| Asia      | Boreal coniferous forest            | 100               | 100  | 100  | 0    | 100  | 0                 | 0    | 0    | 0    | 0    |
| Asia      | Boreal mountain system              | 14.5              | 12   | 65.1 | 4.8  | 48.2 | 11.9              | 15.5 | 94   | 11.9 | 48.8 |
| Asia      | Subtropical desert                  | 36                | 0    | 77.9 | 14   | 31.4 | 33.7              | 1.2  | 80.2 | 10.5 | 27.9 |
| Asia      | Subtropical dry forest              | 39.7              | 4.4  | 73.5 | 17.6 | 83.8 | 32.9              | 3.8  | 68.4 | 11.4 | 72.2 |
| Asia      | Subtropical humid forest            | 49.8              | 26.6 | 94.6 | 21.7 | 94.6 | 43.9              | 17.2 | 86.2 | 9.3  | 90.3 |
| Asia      | Subtropical mountain system central | 38.4              | 24   | 84   | 7.2  | 78.4 | 26.2              | 27.7 | 97.2 | 24.1 | 52.5 |
| Asia      | Subtropical mountain system east    | 0                 | 0    | 0    | 0    | 0    | 0                 | 0    | 0    | 0    | 0    |
| Asia      | Subtropical mountain                | 51.7              | 4.6  | 78.7 | 11.3 | 65   | 42.7              | 4.7  | 78.8 | 8.2  | 62.2 |

|        |                                      |      |      |      |      |      |      |      |      |      |      |
|--------|--------------------------------------|------|------|------|------|------|------|------|------|------|------|
|        | system west                          |      |      |      |      |      |      |      |      |      |      |
| Asia   | Subtropical steppe                   | 40.1 | 1.6  | 73.8 | 24.6 | 47.6 | 34.7 | 3    | 76.9 | 20.1 | 45.5 |
| Asia   | Temperate continental forest         | 63.2 | 27.9 | 72.4 | 12   | 88.6 | 36.2 | 14   | 88.3 | 10.2 | 73.6 |
| Asia   | Temperate desert                     | 33.7 | 9.9  | 80.1 | 7.6  | 67.6 | 43.1 | 11.7 | 92   | 8.4  | 72.1 |
| Asia   | Temperate mountain system            | 32.3 | 20.3 | 66.5 | 12.6 | 75.5 | 30.9 | 25.9 | 85.5 | 23.7 | 73.8 |
| Asia   | Temperate steppe east                | 19.5 | 17   | 71.2 | 12.6 | 49.7 | 21.6 | 14.7 | 82.6 | 13.4 | 52.1 |
| Asia   | Temperate steppe west                | 68.8 | 35.6 | 76.9 | 15.9 | 85.9 | 57.9 | 7.5  | 73.8 | 22.4 | 65.4 |
| Asia   | Tropical desert                      | 14.9 | 2.1  | 76.5 | 12.3 | 20.6 | 13.1 | 1.6  | 80.2 | 16.9 | 15.9 |
| Asia   | Tropical dry forest east             | 17.6 | 5.9  | 97.6 | 27.1 | 57.6 | 22.7 | 6.3  | 91.4 | 21.9 | 57   |
| Asia   | Tropical dry forest west             | 10.4 | 6.5  | 94.8 | 47.1 | 33.1 | 6    | 6.7  | 88.8 | 40.1 | 14.2 |
| Asia   | Tropical moist forest                | 25.6 | 10.8 | 95.7 | 42.7 | 52.6 | 14.3 | 7.9  | 88.4 | 30.9 | 36.2 |
| Asia   | Tropical mountain system             | 38.8 | 17.5 | 80.1 | 28.3 | 50   | 29.9 | 16.9 | 89.3 | 23.2 | 40.7 |
| Asia   | Tropical rainforest                  | 47.4 | 42.4 | 87.2 | 21.6 | 68   | 47.1 | 39.1 | 93.7 | 24.3 | 67.2 |
| Asia   | Tropical shrubland                   | 6.2  | 5.3  | 90   | 32.1 | 23.2 | 8.2  | 3.8  | 88.9 | 23.2 | 21   |
| Europe | Boreal coniferous forest central     | 84.3 | 12   | 97.3 | 13.7 | 36.8 | 46.6 | 7.4  | 93.8 | 10.5 | 53.4 |
| Europe | Boreal coniferous forest east        | 81   | 27   | 89.9 | 8.3  | 83   | 45.2 | 22.2 | 89.4 | 7.1  | 51   |
| Europe | Boreal coniferous forest west        | 67.7 | 25.2 | 86.2 | 5.8  | 69.8 | 47.6 | 25.1 | 79.2 | 21.7 | 51.3 |
| Europe | Boreal mountain system central       | 25.3 | 13.1 | 66.3 | 12.7 | 42.8 | 26.1 | 11.4 | 86.5 | 14.8 | 28.2 |
| Europe | Boreal mountain system east          | 80.1 | 27.9 | 84.3 | 12.6 | 80.3 | 56.2 | 29.1 | 91.9 | 19.4 | 71.4 |
| Europe | Boreal tundra woodland east          | 73.6 | 42.5 | 95.4 | 13.8 | 80.5 | 52.6 | 31.6 | 96.8 | 18.9 | 54.7 |
| Europe | Boreal tundra woodland west          | 88.9 | 5.6  | 77.8 | 11.1 | 94.4 | 100  | 5    | 90   | 5    | 70   |
| Europe | Polar                                | 76.9 | 36.9 | 93.8 | 7.7  | 78.5 | 64.1 | 26.9 | 93.6 | 9.6  | 73.7 |
| Europe | Subtropical dry forest               | 29.3 | 3.8  | 80.6 | 10.8 | 63.7 | 28.4 | 4.5  | 84.8 | 7    | 62.7 |
| Europe | Subtropical mountain system          | 26.9 | 6.2  | 92.4 | 9    | 77.9 | 18.5 | 4.1  | 90.4 | 5.5  | 58.9 |
| Europe | Temperate continental forest central | 26.1 | 11.1 | 86.3 | 19.4 | 50.9 | 21.5 | 7    | 86.2 | 15.1 | 42.8 |
| Europe | Temperate continental forest east    | 0    | 0    | 100  | 0    | 100  | 0    | 0    | 100  | 0    | 50   |
| Europe | Temperate continental forest west    | 28.2 | 7.3  | 87.5 | 2.1  | 54.7 | 17.7 | 10.5 | 92.7 | 2.2  | 48.8 |

|               |                                 |      |      |      |      |      |      |      |      |      |      |
|---------------|---------------------------------|------|------|------|------|------|------|------|------|------|------|
| Europe        | Temperate desert                | 45   | 2    | 90.6 | 2    | 34.2 | 57.1 | 1.4  | 98   | 2    | 49.7 |
| Europe        | Temperate mountain system       | 45.7 | 20.4 | 74.3 | 11.8 | 68.9 | 34   | 21.3 | 91.8 | 13.5 | 65.2 |
| Europe        | Temperate oceanic forest Europe | 36.6 | 8.9  | 97.6 | 4.9  | 91.9 | 51.2 | 24.4 | 90.6 | 13   | 91.3 |
| Europe        | Temperate steppe east           | 2.6  | 1.6  | 53.4 | 5.8  | 7.4  | 13.8 | 4.6  | 78.9 | 13.8 | 24.8 |
| Europe        | Temperate steppe west           | 19   | 3.4  | 83.1 | 2.2  | 35.5 | 34.1 | 5.7  | 93.3 | 2.4  | 48   |
| North America | Boreal coniferous forest east   | 66   | 22.6 | 69.8 | 1.9  | 71.7 | 65.8 | 26.6 | 72.8 | 8.9  | 86.1 |
| North America | Boreal coniferous forest west   | 71.4 | 14.3 | 100  | 14.3 | 71.4 | 43.5 | 30.6 | 97.9 | 9.3  | 63.7 |
| North America | Boreal mountain system          | 48   | 8.8  | 91.2 | 10.8 | 79.4 | 36   | 15.3 | 97.3 | 23.4 | 79.3 |
| North America | Boreal tundra woodland east     | 29.3 | 13.1 | 91.9 | 52.5 | 44.4 | 48.6 | 27.8 | 98.6 | 30.6 | 79.2 |
| North America | Boreal tundra woodland west     | 52.5 | 9.1  | 90.9 | 7.6  | 81.5 | 50.2 | 7.8  | 91.2 | 8.1  | 66.3 |
| North America | Polar                           | 54.1 | 17.5 | 88.1 | 6.9  | 79.8 | 63.9 | 23.5 | 90.8 | 12.1 | 81.3 |
| North America | Subtropical desert              | 8.6  | 3.3  | 69.6 | 10.4 | 20.3 | 13.9 | 5.2  | 72   | 8.9  | 24.6 |
| North America | Subtropical dry forest          | 5.8  | 1.4  | 98.6 | 10.1 | 20.3 | 13   | 1.4  | 97.1 | 10.1 | 36.2 |
| North America | Subtropical humid forest        | 49.7 | 15.3 | 97.7 | 5.6  | 89.3 | 45.2 | 3.5  | 71.4 | 8.7  | 74.1 |
| North America | Subtropical mountain system     | 12   | 6.3  | 88.6 | 19.5 | 35.4 | 14.4 | 6.7  | 84   | 20.2 | 35.7 |
| North America | Subtropical steppe              | 21.8 | 8.1  | 84.7 | 5.4  | 36.2 | 24.8 | 5.9  | 97.7 | 7.8  | 39.1 |
| North America | Temperate continental forest    | 50   | 25   | 87.5 | 37.5 | 50   | 76.5 | 41.2 | 64.7 | 32.4 | 88.2 |
| North America | Temperate desert                | 28.7 | 4.5  | 80.4 | 5.4  | 48.2 | 35.5 | 6.9  | 88.5 | 4.1  | 53.6 |
| North America | Temperate mountain system east  | 55.9 | 2.9  | 85.3 | 2.9  | 88.2 | 60.9 | 4.3  | 95.7 | 4.3  | 82.6 |
| North America | Temperate mountain system west  | 33   | 2.8  | 85.5 | 3.6  | 49.6 | 39.4 | 4.2  | 94.8 | 3    | 50.1 |
| North America | Temperate oceanic forest        | 50   | 0    | 25   | 0    | 83.3 | 66.7 | 16.7 | 100  | 16.7 | 100  |
| North America | Temperate steppe                | 19.1 | 6    | 77.9 | 15.7 | 26.4 | 13.3 | 5.6  | 93.1 | 17.2 | 21.9 |
| North America | Tropical dry forest             | 17.4 | 6    | 69.1 | 22.1 | 31.5 | 19.1 | 7    | 68.8 | 14.6 | 40.1 |
| North America | Tropical moist forest           | 38.9 | 3.5  | 50.6 | 11.7 | 54.1 | 39.8 | 9.1  | 71   | 24.9 | 58.9 |
| North America | Tropical mountain system        | 65.5 | 31   | 75.9 | 31   | 75.9 | 71.8 | 25.6 | 89.7 | 28.2 | 87.2 |
| North America | Tropical rainforest             | 72.2 | 17.2 | 71.5 | 17.2 | 77.5 | 65.1 | 18.9 | 79.3 | 20.7 | 79.9 |
| Oceania       | Subtropical desert              | 41.5 | 13.6 | 95.1 | 18.9 | 64   | 44.4 | 14   | 98.4 | 11.6 | 61.8 |
| Oceania       | Subtropical dry forest          | 54.5 | 10.6 | 97   | 7.6  | 81.8 | 36   | 4.5  | 89.9 | 2.2  | 69.7 |

|               |                               |      |      |      |      |      |      |      |      |      |      |
|---------------|-------------------------------|------|------|------|------|------|------|------|------|------|------|
| Oceania       | Subtropical humid forest Au   | 54.5 | 18.2 | 72.7 | 18.2 | 100  | 100  | 0    | 50   | 0    | 100  |
| Oceania       | Subtropical steppe east       | 51.9 | 1.3  | 97.3 | 3.9  | 72.3 | 44.1 | 1.9  | 99.5 | 2.8  | 68.3 |
| Oceania       | Subtropical steppe west       | 30   | 0    | 90   | 30   | 90   | 26.3 | 10.5 | 73.7 | 26.3 | 42.1 |
| Oceania       | Temperate mountain system     | 50.5 | 16.5 | 55.7 | 5.2  | 59.8 | 69.8 | 17.5 | 77.8 | 15.9 | 65.1 |
| Oceania       | Temperate oceanic forest      | 74   | 4.2  | 58.3 | 5.2  | 71.9 | 84.6 | 7.7  | 86.2 | 6.2  | 81.5 |
| Oceania       | Tropical desert east          | 12.5 | 8.9  | 50   | 46.4 | 30.4 | 12.5 | 12.5 | 100  | 62.5 | 37.5 |
| Oceania       | Tropical desert west          | 33.3 | 0    | 100  | 0    | 100  | 56.3 | 12.5 | 81.3 | 50   | 93.8 |
| Oceania       | Tropical dry forest           | 21.8 | 9    | 78.8 | 18.9 | 71.8 | 20.2 | 6.5  | 78.3 | 15.1 | 57   |
| Oceania       | Tropical moist forest         | 0    | 0    | 0    | 0    | 0    | 0    | 0    | 0    | 0    | 0    |
| Oceania       | Tropical mountain system      | 42.9 | 71.4 | 100  | 0    | 71.4 | 66.7 | 83.3 | 100  | 0    | 66.7 |
| Oceania       | Tropical rainforest           | 57.5 | 35   | 75   | 25   | 75   | 51.4 | 40.5 | 86.5 | 21.6 | 75.7 |
| Oceania       | Tropical shrubland            | 26.9 | 13.5 | 87.2 | 27.2 | 65.1 | 24.5 | 11.7 | 85.2 | 24.8 | 43.4 |
| South America | Subtropical dry forest        | 35.8 | 0    | 100  | 6    | 86.6 | 77.5 | 7    | 98.6 | 2.8  | 95.8 |
| South America | Subtropical humid forest      | 10.1 | 6.7  | 87.6 | 7.5  | 47.3 | 10.1 | 5    | 91.4 | 6.8  | 29.1 |
| South America | Subtropical mountain system   | 23.5 | 8.8  | 61.8 | 16.2 | 45.6 | 15   | 15   | 78.3 | 18.3 | 40   |
| South America | Subtropical steppe            | 18   | 8.4  | 54.7 | 6.8  | 42.1 | 8.3  | 10.4 | 64.1 | 16.9 | 24.6 |
| South America | Temperate mountain system     | 64.7 | 17.6 | 88.2 | 23.5 | 82.4 | 54.2 | 16.7 | 83.3 | 4.2  | 70.8 |
| South America | Temperate oceanic forest      | 13.8 | 3.4  | 96.6 | 6.9  | 69   | 34.3 | 2.9  | 91.4 | 11.4 | 68.6 |
| South America | Temperate steppe              | 17.4 | 10.4 | 79.5 | 12.4 | 36.4 | 12.8 | 4.9  | 78.7 | 6.8  | 26.6 |
| South America | Tropical desert               | 11.1 | 0    | 75.6 | 15.6 | 20   | 3.9  | 0    | 82.4 | 15.7 | 13.7 |
| South America | Tropical dry forest east      | 59.1 | 14.5 | 38.2 | 21.4 | 53.2 | 62.2 | 16.1 | 42.3 | 17   | 56.6 |
| South America | Tropical dry forest north     | 92.9 | 35.7 | 78.6 | 28.6 | 85.7 | 94.7 | 42.1 | 84.2 | 21.1 | 94.7 |
| South America | Tropical dry forest south     | 32.6 | 15.6 | 59.1 | 5.8  | 61.7 | 63.7 | 30.6 | 86.5 | 25.4 | 79.4 |
| South America | Tropical moist forest north   | 95.1 | 28.2 | 87.3 | 35.9 | 94.4 | 89.1 | 21   | 89.1 | 25.5 | 95.9 |
| South America | Tropical moist forest south   | 47.3 | 3.2  | 75.3 | 2.7  | 68.5 | 48.6 | 4.9  | 78.7 | 2.6  | 64.2 |
| South America | Tropical mountain system east | 17.7 | 1.5  | 78.3 | 1    | 49   | 12.6 | 1.5  | 53.3 | 0.5  | 30.2 |
| South America | Tropical mountain system west | 50.9 | 33.3 | 60.9 | 11.3 | 59   | 51.6 | 31.8 | 64   | 10.3 | 60.6 |
| South America | Tropical rainforest           | 60.4 | 21.1 | 87.8 | 2.1  | 93   | 62.3 | 25   | 94.2 | 3.4  | 95.1 |
| South America | Tropical shrubland            | 16.7 | 0    | 50   | 16.7 | 66.7 | 25   | 0    | 75   | 37.5 | 75   |

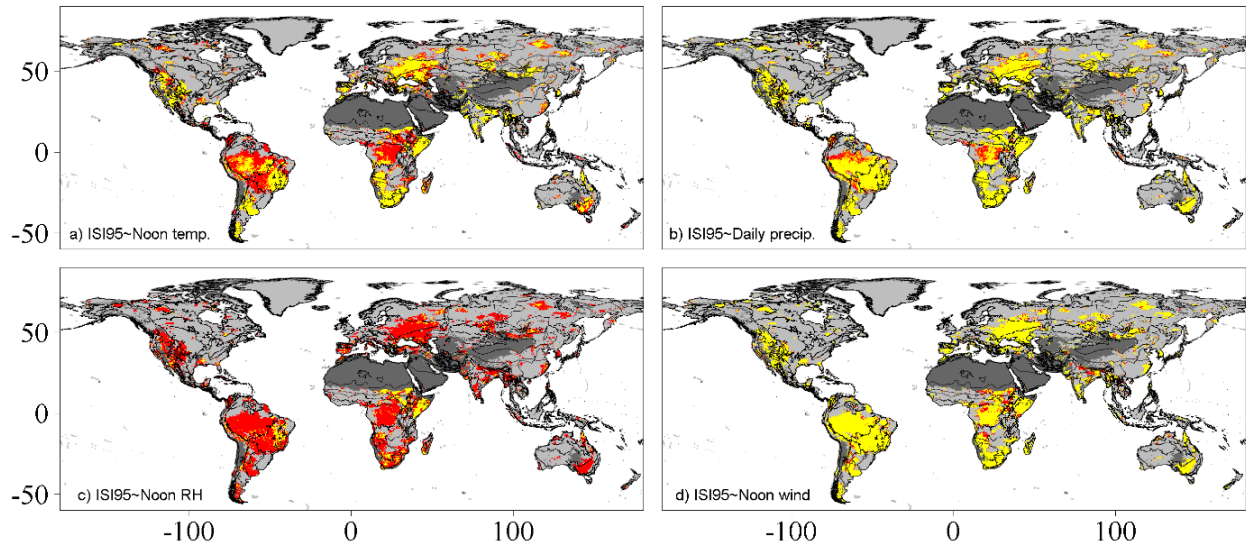

Figure S3: FWI inputs attributed as drivers of the 95<sup>th</sup> percentile of annual ISI values (ISI<sub>95</sub>), as determined by the partial Mann-Kendall test (see methods). Yellow regions indicate where trends in the response variable, ISI<sub>95</sub>, are significant, but where the corresponding input variable is not a driver of the observed trend. Red regions indicate where ISI<sub>95</sub> trends are significant and the corresponding input variable is a driver of the observed trend.
